# Supplementary material for: Genetics and Regulatory Impact of Alternative Polyadenylation in Human B-Lymphoblastoid Cells
Source: PLoS Genet. 2012 Aug 16;8(8):e1002882. doi: 10.1371/journal.pgen.1002882 (PMC3420953; doi:10.1371/journal.pgen.1002882)
Supplement: Table S3 — Classification of genes according to alternative polyadenylation. Each column represents one pattern of alternative polyadenylation. Classes are defined as in Figure 1B of main text; class III-S indicates genes with only one 3′ length form which did not lie within an annotated 3′ untranslated region according to the UC Santa Cruz human genome annotation [63]. Bold and standard type represent numbers and proportions, respectively, of the indicated features falling into the indicated class. (XLSX) [file pgen.1002882.s008.xlsx]

## Sheet: Table S3
Supplementary Table 3
	I	II	III	III-S	Total
Coding	5784	1702	611	263	8360
	0.691866	0.203589	0.0730861	0.0314593
Noncoding	503	72	35	65	675
	0.745185	0.106667	0.0518519	0.0962963
