# Supplementary material for: Genetics and Regulatory Impact of Alternative Polyadenylation in Human B-Lymphoblastoid Cells
Source: PLoS Genet. 2012 Aug 16;8(8):e1002882. doi: 10.1371/journal.pgen.1002882 (PMC3420953; doi:10.1371/journal.pgen.1002882)
Supplement: Table S5 — Genes subject to alternative polyadenylation with regulatory elements in shared or differential regions are enriched for particular gene functions. Each section reports results from analysis of a set of class II genes (see Figure 1B of main text for definitions) with particular characteristics of cis-regulatory elements in 3′ untranslated regions (UTRs). The set of genes harboring miRNA sites, AREs, GREs, PUF sites, or Alu elements in shared regions of 3′ UTRs alone, and separately, the set of genes harboring such elements in differential regions alone (see Figure 2B of main text for definitions), was tested for enrichment of Gene Ontology (GO) annotations relative to the complete set of genes harboring elements in any position in the 3′ UTR. p-value, results of a Fisher's exact test for over-representation of genes in the indicated GO term in the indicated gene set, corrected for multiple testing by the Benjamini-Hochberg method. Only GO terms with enrichment significant at corrected p<0.05 are reported. (XLSX) [file pgen.1002882.s010.xlsx]

## Sheet: Table S5
Supplementary Table 5
Regulatory elements in differential region only
GO:0002376 Immune system process	0.0003
Regulatory elements in shared region only
GO:0016192 Vesicle-mediated transport	0.003
GO:0033673 Negative regulation of kinase activity	0.004
GO:0051094 Positive regulation of developmental process	0.018
GO:0008610 lipid biosynthetic process	0.034
