# Supplementary material for: Genetics and Regulatory Impact of Alternative Polyadenylation in Human B-Lymphoblastoid Cells
Source: PLoS Genet. 2012 Aug 16;8(8):e1002882. doi: 10.1371/journal.pgen.1002882 (PMC3420953; doi:10.1371/journal.pgen.1002882)
Supplement: Table S8 — Luciferase reporter vectors used in this work. (XLSX) [file pgen.1002882.s013.xlsx]

## Sheet: Table S8
Supplementary Table 8. List of dual-luciferase reporter vectors
ID	Parent vector	Gene	Feature description	Note
pOKY001	psiCheck2*		No UTR	Has LIC tag for cloning 3' UTR of interest
pOKY002	pOKY001	SV40	SV40 late polyA signal
pOKY006	pOKY001	IRF5	3' UTR + 100 bp downstream sequence from GM10860	prox PAS=AATAAA, distal PAS=AATAAA, WT ARE
pOKY034	pOKY006	IRF5	3' UTR + 100 bp downstream sequence from GM10860	prox PAS=AATGAA (mutated from pOKY006), distal PAS=AATAAA, WT ARE
pOKY015	pOKY006	IRF5	3' UTR + 100 bp downstream sequence from GM10860	prox PAS=AATAAA, distal PAS=AATAAA, mutant ARE
pOKY016	pOKY015	IRF5	3' UTR + 100 bp downstream sequence from GM10860	prox PAS=AATGAA (mutated from pOKY015), distal PAS=AATAAA, mutant ARE
pOKY010	pOKY001	EIF2A	3' UTR + 100 bp downstream sequence from GM17220	prox PAS=ATTAAA, distal PAS=AATAAA
pOKY011	pOKY001	EIF2A	3' UTR + 100 bp downstream sequence from GM17253	prox PAS=ATTAAA, distal PAS=AACAAA, Sequence identical with pOKY010 except one nucleotide in distal PAS
pOKY012	pOKY001	DIP2B	3' UTR + 100 bp downstream sequence from GM10860	prox PAS=ATTAAA, distal PAS=AATAAA, WT miR-101 binding site
pOKY033	pOKY012	DIP2B	3' UTR + 100 bp downstream sequence from GM10860	prox PAS=ACTAAA (mutated from pOKY012), distal PAS=AATAAA, WT miR-101 binding site
pOKY078	pOKY012	DIP2B	3' UTR + 100 bp downstream sequence from GM10860	prox PAS=ATTAAA, distal PAS=AATAAA, mutant miR-101 binding site
pOKY080	pOKY033	DIP2B	3' UTR + 100 bp downstream sequence from GM10860	prox PAS=ACTAAA, distal PAS=AATAAA, mutant miR-101 binding site
pOKY025	pOKY001	NAB1	3' UTR + 100 bp downstream sequence from GM17220	prox PAS=AATAAA, distal PAS=AATAAA, WT ARE
pOKY036	pOKY025	NAB1	3' UTR + 100 bp downstream sequence from GM17220	prox PAS=GATAAA (mutated from pOKY025), distal PAS=AATAAA, WT ARE
pOKY081	pOKY025	NAB1	3' UTR + 100 bp downstream sequence from GM17220	prox PAS=AATAAA, distal PAS=AATAAA, mutant ARE
pOKY083	pOKY036	NAB1	3' UTR + 100 bp downstream sequence from GM17220	prox PAS=GATAAA, distal PAS=AATAAA, mutant ARE
* From Promega
